# Hydrogen molecules in the cosmos

David A Williams presents his Presidential Address for 1999, given to the RAS on 12 February this year.

I have had an interest in molecular hydrogen throughout my research career, even before I became an astrophysicist, so it seems appropriate to devote this Presidential Address to the role of  $H_2$  in astronomy. The last three decades have been a period of wonderful discoveries involving astronomical molecules, but back in the 1960s, when I began research, astronomical  $H_2$  was still a matter only of speculation. Since then it has become apparent that  $H_2$  is abundant in the universe, that its emissions trace a variety of situations, and that it has an active role to play in the cycle of matter from diffuse gas to dense objects.

Molecular hydrogen in interstellar space was first discovered in 1970 by Carruthers in a rocket observation of Lyman band absorption at wavelengths between 100 and 110 nm of starlight from  $\xi$ Per by a diffuse interstellar cloud. This was the first of a series of important observations of  $H_2$  in space (table 1). In parallel with these observational developments were programmes of laboratory and theoretical development in which many scientists have played a role. This activity includes laboratory investigations of spectroscopy and of reaction kinetics, and theoretical studies of  $H_2$  chemistry and excitation in many kinds of astronomical situation. Dalgarno and his colleagues at Harvard have been pre-eminent in making both fundamental studies of  $H_2$  and modelling its response in the interstellar medium.

All of this activity assumes that  $H_2$  is actually important in astronomy. Table 2 lists a number of reasons why this is so, including the significant fact that much of the mass of non-stellar baryonic matter in the universe is in the form of molecular hydrogen, and shows that  $H_2$  touches every kind of system in the universe. Obviously, then, I must be selective! In this Address, I want to explore several of the important roles of  $H_2$ : in the early universe, where  $H_2$  has an active controlling role; in near-stellar environments, where  $H_2$  is an informative tracer of a wide range of physical conditions; and in star formation, where  $H_2$  fuels a chemistry to provide other molecular coolants that permit gravitational collapse. Finally, I shall describe new laboratory and

**It is less than 30 years since molecular hydrogen was first identified in a non-terrestrial source. Since then, many wonderful discoveries concerning cosmic  $H_2$  have been made, in observations, experiments, and theory. It has become evident that  $H_2$  is found in many astronomical environments and almost all types of astronomical object. Molecular hydrogen had an important role in promoting baryonic structure in the early universe. It is most abundant in interstellar molecular clouds in the Milky Way and other galaxies. These clouds provide the reservoir of mass from which new stars are formed. The impact of stars on their environments often creates conditions in which  $H_2$  can be excited and for which  $H_2$  emission is an effective tracer. Examples of all these phenomena are given in this article.**

theoretical work on the surface chemistry on dust that is believed to be the main formation route for interstellar  $H_2$  in the Galaxy.

## Molecular hydrogen in the early universe

In this section, I shall argue that astrochemistry pre-dated the formation of galaxies, and was influential in causing structure to develop in the baryonic matter. That structure ultimately produced the galaxies (cf. Lepp and Stancil 1998).

## Early chemistry

In the Standard Big Bang Nucleosynthesis Model, the universe became cool enough for

helium nuclei and electrons to combine at a redshift  $z$  of about 2500 (about  $10^5$  years post-Big Bang) and for hydrogen neutralization at a redshift of 1300 ( $\sim 3 \times 10^5$  years post-Big Bang), assuming that the cosmological density parameter  $\Omega_0$  is unity, and Hubble's constant,  $H_0$ , is  $50 \text{ km s}^{-1} \text{ Mpc}^{-1}$ . Since hydrogen was the most abundant element, the universe went through a phase transition from almost entirely ionized to mostly neutral, at this epoch; matter and radiation were therefore decoupled.

Once some neutral atoms were present, chemistry – in the real sense, i.e. involving molecules – began. At the earliest stages, the presence of neutral helium and ionized hydrogen allowed the formation of molecular ions such as  $He_2^+$ ,  $HeH^+$  and  $HeD^+$  through radiative association. However, the abundances of these molecules were never high enough to play an important role, nor to trace these early stages. Once neutral hydrogen was available, then other molecules, including  $H_2^+$ ,  $HD^+$ ,  $H_2$  and  $HD$ , were able to form, and the abundance of  $H_2$  was high enough for it to influence the development of structure in the early universe. Lithium recombination occurred from about  $z=450$ , but its relative abundance is so small ( $Li/H \approx 10^{-10}$ ) that lithium chemistry is unimportant for the present discussion.

All the chemical reaction schemes were initiated by radiative processes, such as

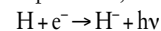

and

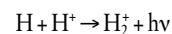

which could be followed by ion–molecule exchange reactions, such as

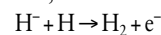

and

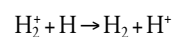

The full network of reactions was fairly complex (see figure 1) and as the conditions changed in the expansion of the universe, different reactions and products were emphasized. However, the abundances of the main molecular species were always rather low. At  $z \approx 10^3$ , the fractional abundance of  $H_2$  was about  $10^{-12}$ , with the abundances of  $HD$  and  $H_2^+$  about 5 and 7 orders of magnitude smaller. By  $z \approx 10^2$ , fractional abundances were close to

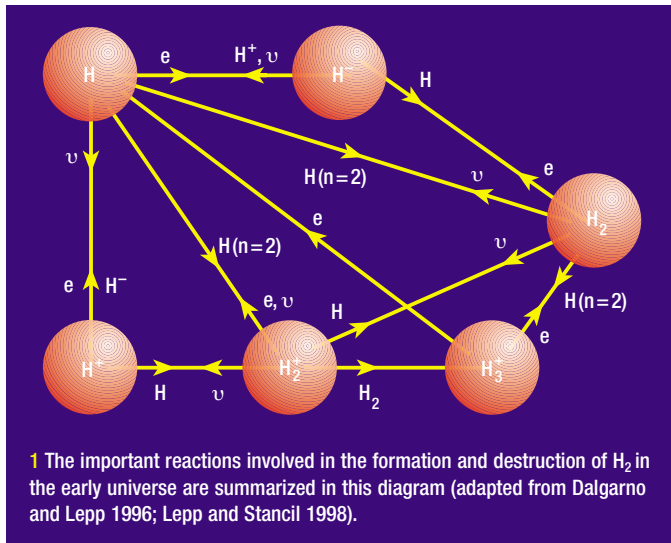

1 The important reactions involved in the formation and destruction of H<sub>2</sub> in the early universe are summarized in this diagram (adapted from Dalgarno and Lepp 1996; Lepp and Stancil 1998).

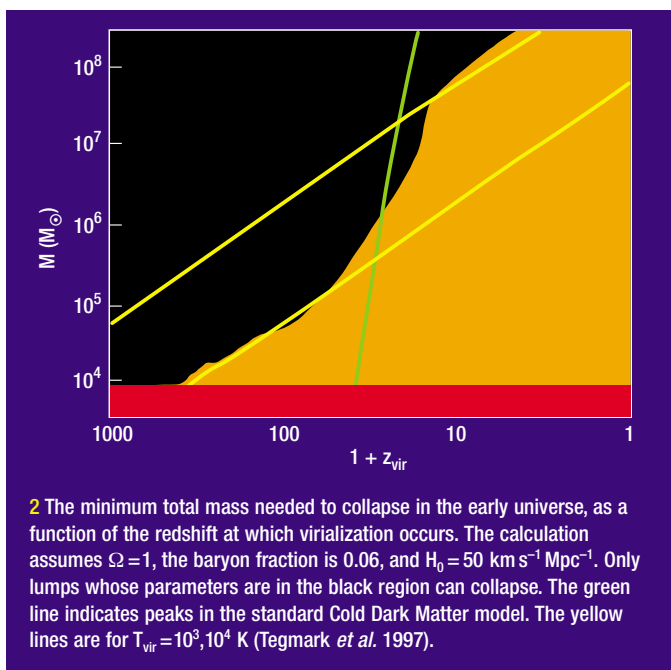

2 The minimum total mass needed to collapse in the early universe, as a function of the redshift at which virialization occurs. The calculation assumes  $\Omega = 1$ , the baryon fraction is 0.06, and  $H_0 = 50 \text{ km s}^{-1} \text{ Mpc}^{-1}$ . Only lumps whose parameters are in the black region can collapse. The green line indicates peaks in the standard Cold Dark Matter model. The yellow lines are for  $T_{vir} = 10^3, 10^4$  K (Tegmark *et al.* 1997).

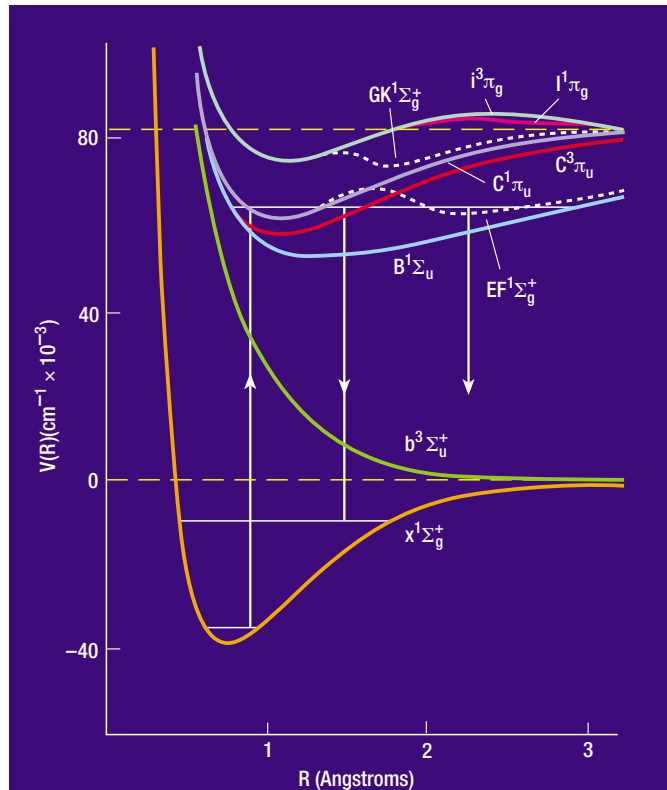

3 Absorption in the Lyman B-X and Werner C-X bands of H<sub>2</sub> from the  $v''=0$  level is followed by relaxation into either bound or free states of the ground electronic states, X. The former populates vibration-rotation states of X, while the latter destroy H<sub>2</sub> (cf. Stecher and Williams 1967). Collisional excitation between vibration-rotation levels can also occur. Molecules may also be formed in excited internal states (cf. Duley and Williams 1993).

Table 1: Key observations of cosmic H<sub>2</sub>

| Observation                                                 | Reference                                                                        | Source                                      |
|-------------------------------------------------------------|----------------------------------------------------------------------------------|---------------------------------------------|
| Lyman band absorption B-X                                   | Carruthers 1970                                                                  | Rocket UV                                   |
| Lyman and Werner band absorption B-X, C-X                   | Spitzer <i>et al.</i> 1974                                                       | Copernicus satellite UV survey              |
| Vibration-rotation emission 1-0                             | Gautier <i>et al.</i> 1976<br>Treffers <i>et al.</i> 1976                        | Ground-based observation                    |
| Line and continuum emission B-X, C-X                        | Jordan <i>et al.</i> 1977<br>Brown <i>et al.</i> 1981<br>Witt <i>et al.</i> 1989 | Rocket UV<br>IUE satellite<br>IUE satellite |
| Pure vibration absorption by trapped H <sub>2</sub> on dust | Sandford <i>et al.</i> 1993                                                      | Ground-based observation                    |

Table 2: Why is H<sub>2</sub> important?

- H<sub>2</sub> is the most abundant molecule in the universe
- A significant fraction of non-stellar baryonic matter in spiral galaxies is in H<sub>2</sub>
- H<sub>2</sub> is an important coolant of diffuse gas from temperatures  $\leq 10^4$  K down to temperatures  $\approx 100$  K
- H<sub>2</sub> cooling influenced structure formation in the early universe
- H<sub>2</sub> infrared emission traces warm gas, collisionally and/or radiatively excited
- H<sub>2</sub> promotes all interstellar chemistry

the limiting values of  $10^{-6}$  for H<sub>2</sub>, and  $10^{-9}$  for HD. All other molecules were very much less abundant. Thus, by  $z \sim 10$ , the interesting era for structure development, about one part in a million of hydrogen was in H<sub>2</sub>. Was this trace amount of H<sub>2</sub> significant?

### Early structure

Molecular hydrogen has a vibration-rotation

energy level structure that enables the molecule to act as a coolant down to relatively low temperatures. Collisions between H atoms and H<sub>2</sub> molecules in the pre-galactic gas populated the H<sub>2</sub> internal energy levels, from which the molecule ultimately radiated, thereby cooling the gas. The importance of suppressing a temperature rise during collapse can be seen from the expression for the Jeans mass, the baryonic

mass above which a self-gravitating cloud is unstable to collapse:

$$M_J \approx 2 \times 10^5 M_\odot (T/100)^{3/2} n^{-1/2}$$

where  $T$  is the gas temperature (K) and  $n$  is the number density  $\text{cm}^{-3}$ . For the recombination era, therefore,  $M_J \approx 10^5 - 10^6 M_\odot$ , comparable with the masses of globular clusters observed in the Milky Way and other galaxies. Consequently, Peebles and Dicke (1968) suggested

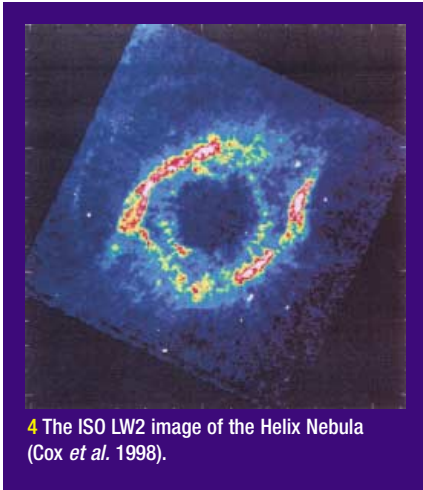

4 The ISO LW2 image of the Helix Nebula (Cox *et al.* 1998).

that globular clusters were the first objects to form. These considerations indicated that a more detailed study was needed, and there have been many studies in which the microscopic processes were accounted for, in various degrees of detail, since the early work of Couchman and Rees (1986).

Recently, Haiman *et al.* (1996b) have carried out hydrodynamical modelling of the 1-D collapse of pre-galactic spherical gas clouds including chemistry of H<sub>2</sub> formation and H<sub>2</sub> cooling. These simulations indicate that bound objects of baryonic masses 10<sup>2</sup>–10<sup>3</sup> M<sub>⊙</sub> may have formed, and could have been the progenitors of the postulated Population III stars.

In the expanding universe, the cooling timescale must be shorter than the Hubble time, otherwise structure cannot form. Figure 2 indicates how the total mass of the collapsed region depended on the virialization redshift for a universe of cold dark matter with baryonic fractional mass of 0.06. The details of this figure depend rather sensitively on the H<sub>2</sub> cooling function, which is not precisely known at present. However, the diagram does show that relatively small objects were able to collapse at early times, and conversely – suggesting a “bottom-up” universe, i.e. one in which larger units formed from the aggregation of smaller units.

### Later developments

Population III stars would have affected subsequent evolution, not only through the injection of heavy elements into the intergalactic medium (IGM), but also through their UV radiation and winds. The UV radiation re-ionized the IGM (which had been neutral since the recombination era) and this promoted more H<sub>2</sub> formation (see figure 1). A simulation by Ostriker and Gnedin (1996) shows how a burst of Population III star formation, initiated by H<sub>2</sub> cooling, re-ionized the IGM and suppressed further star formation by  $z=12$ . Cooling in the IGM initially by H-atom lines and subsequently by H<sub>2</sub> initiated a second burst of star formation of stars with

increased metallicity, the Population II stars.

This is not quite the end of the story as far as H<sub>2</sub> in the early universe is concerned. Shocks from cloud–cloud collisions, or from explosions of the earliest objects, caused compression of gas, and cooling led to even higher densities with increased H<sub>2</sub> fractional abundances. A number of models incorporating these processes have been explored. The gas, initially ionized and hot (~10<sup>4</sup> K) cooled at first by inverse Compton scattering, then by Lyman  $\alpha$  emission, and finally (below 7000 K) by H<sub>2</sub> emission. Kang and Shapiro (1992) have shown that the H<sub>2</sub> fraction in the cooling shells (formed through the H<sup>-</sup> and H<sub>2</sub><sup>+</sup> reactions as in the early universe) can rise to about 10<sup>-3</sup>, enabling the shells to cool to 100 K. While a high radiation field could inhibit this process, at later stages ( $z=2-4$ ), the effect of quasar UV radiation has been found to enhance ionization, H<sub>2</sub> production and cooling (Haiman *et al.* 1996a).

Thus, it appears that H<sub>2</sub> was an important agent in promoting baryonic structure in the early universe. Is there any hope of H<sub>2</sub> radiation also being a tracer of these times? Lepp and Shull (1984) have argued that large amounts of gravitational potential energy must be radiated away from collapsing objects at high redshift, and that since there was no dust, the radiation was not degraded. However, such radiation has not yet been detected.

### Molecular hydrogen as a tracer of galactic events

The infrared spectrum of H<sub>2</sub> is rich in lines arising from transitions in its vibration-rotation and pure rotation energy levels. The study of these lines has been remarkably productive in elucidating the physical conditions in a variety of astronomical situations. In this section, I discuss briefly several examples where observations of H<sub>2</sub> lines help our understanding of the physical nature of the regions, and I also describe a couple of examples that we do not understand at all! In none of these examples is H<sub>2</sub> controlling the region’s development. It is purely a tracer

Much of the interest in these observations lies in determining the means by which the excited energy levels of H<sub>2</sub> are populated (see figure 3). Do collisions dominate, or is radiative pumping the main mechanism? Or does the formation mechanism of H<sub>2</sub> produce molecules in excited states? There is a traditional unwillingness by astronomers to invoke an active role for interstellar dust, but as we shall see below it seems inescapable that H<sub>2</sub> molecules are formed on dust in excited states.

### Excited H<sub>2</sub> in a planetary nebula

Planetary nebulae are visually beautiful, and have a complex and interesting physics and chemistry (Howe and Williams 1998). The

Helix is one of the nearest (about 160 pc distant; Cahn *et al.* 1992) and appears as a double ring both optically (Walsh and Meaburn 1987) and in the molecular envelope (Young *et al.* 1997). The envelope consists of many dense blobs which can be associated with the cometary globules seen at optical wavelengths. The globules have been detected in CO lines, and the chemistry in them is in steady state (Howe, Hartquist and Williams 1994).

Recent imaging and spectroscopy of the Helix have been made by instruments on board the Infrared Space Observatory (ISO) (Cox *et al.* 1998). The image from filter LW2 (around 6.9  $\mu$ m) shows a similar structure to the optical and molecular images, of globules, filaments, and wisps of gas (see figure 4) and the spectrum of the region 5–16.6  $\mu$ m shows a series of pure rotational H<sub>2</sub> lines S(7)–S(2) on a continuum that is well fitted by the zodiacal light. The lines indicate H<sub>2</sub> rotational excitation up to at least J=9, and the excitation diagram shows that these levels are all populated in a hot gas at a single temperature of 900 K, and the density must be in excess of 10<sup>5</sup> H<sub>2</sub> cm<sup>-3</sup> (figure 5). Radiative pumping can play no significant part; in fact, from the geometry and knowledge of the central star, radiation is not expected to play any role.

What is the origin of the warm H<sub>2</sub> gas? It seems likely that shock excitation is responsible, and that we are seeing the effect of the well-known (to theoreticians) interacting winds model (Kahn 1983; Kwok 1983). In this, a fast stellar wind sets up a double shock structure; the outer shock is driven through the pre-existing AGB wind. From the H<sub>2</sub> spectrum the mass loss rate and velocity of the stellar wind can be derived, and are found to be 3  $\times$  10<sup>-8</sup> M<sub>⊙</sub> yr<sup>-1</sup> and 1000 km s<sup>-1</sup> respectively. Thus, observations of H<sub>2</sub> rotational emission have constrained the central white dwarf properties.

### Molecular hydrogen in PDRs

Studies of CO 1-0 emission in giant molecular clouds reveal that the clouds are far from uniform and are clumpy on a scale of a few visual magnitudes; also, it is apparent that the gas is often associated with hot stars. In fact, much of the molecular material in the Galaxy is significantly affected by powerful UV radiation fields that may be thousands of times as intense as the mean interstellar radiation field. These photodissociation regions, or photon dominated regions (PDRs) have a structure indicated schematically in figure 6. The chemical and radiative diagnostics of such structures have been explored extensively (e.g. Hollenbach and Tielens 1997; Sternberg 1998). Where radiation processes are important, predicted excitation diagrams for H<sub>2</sub>(v,J) show quite different characteristics from those for a warm collisionally dominated region, such as shocked gas (see

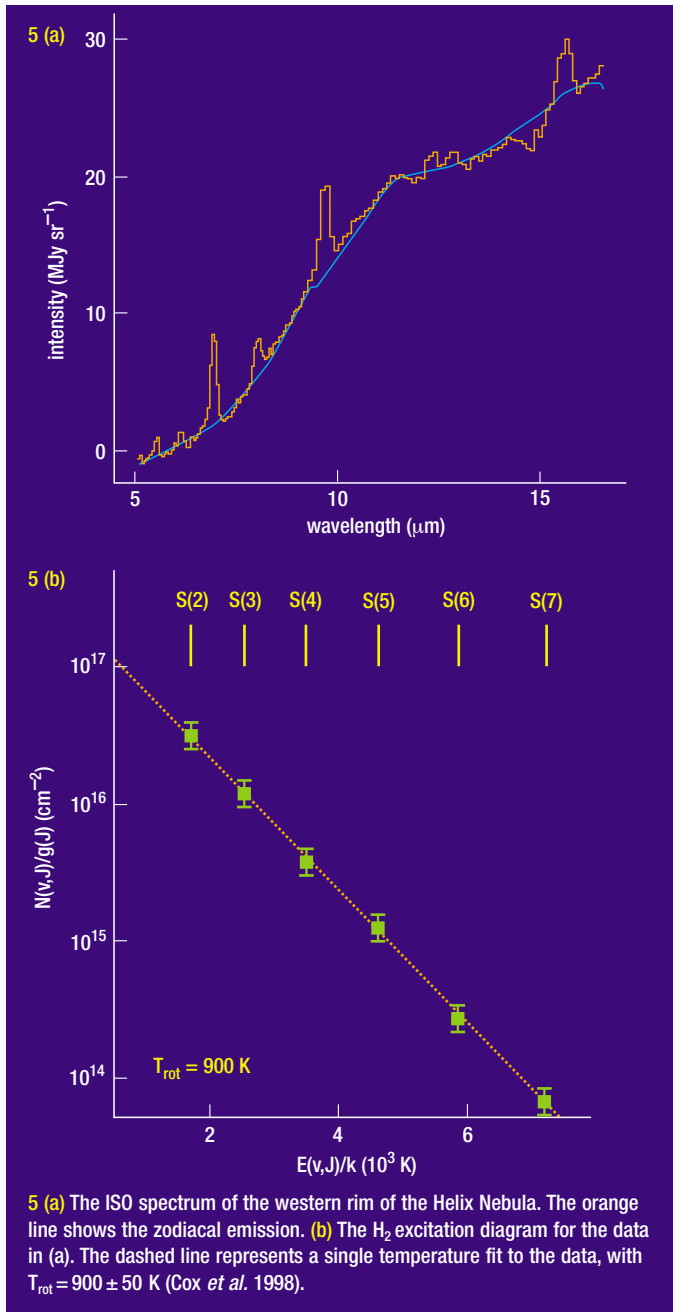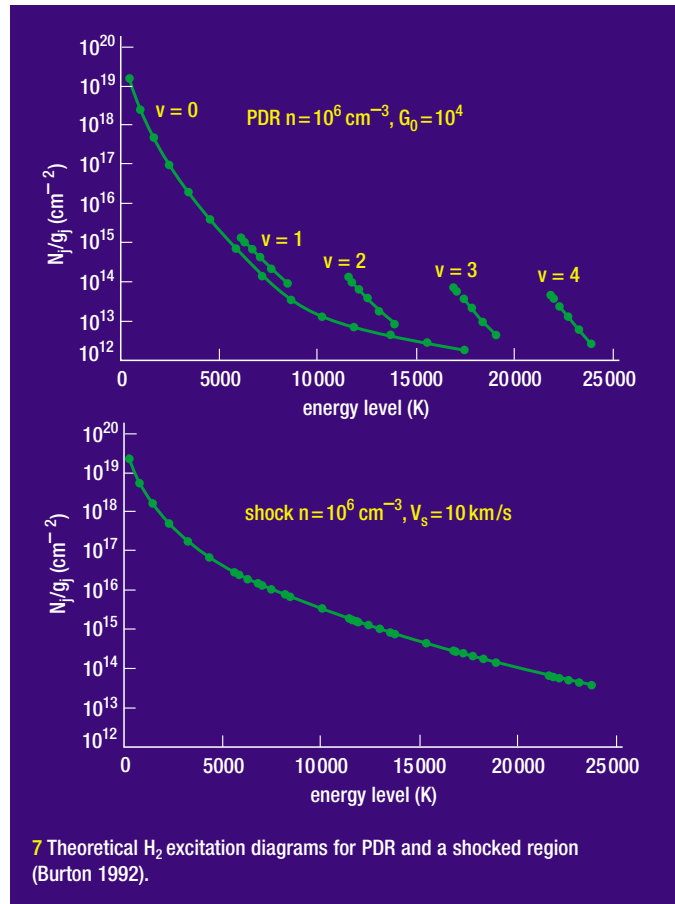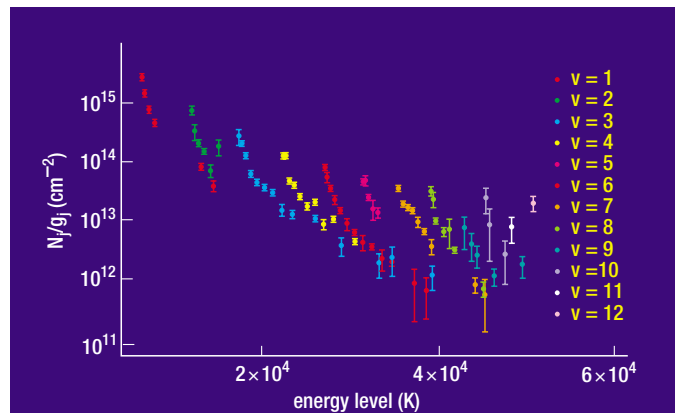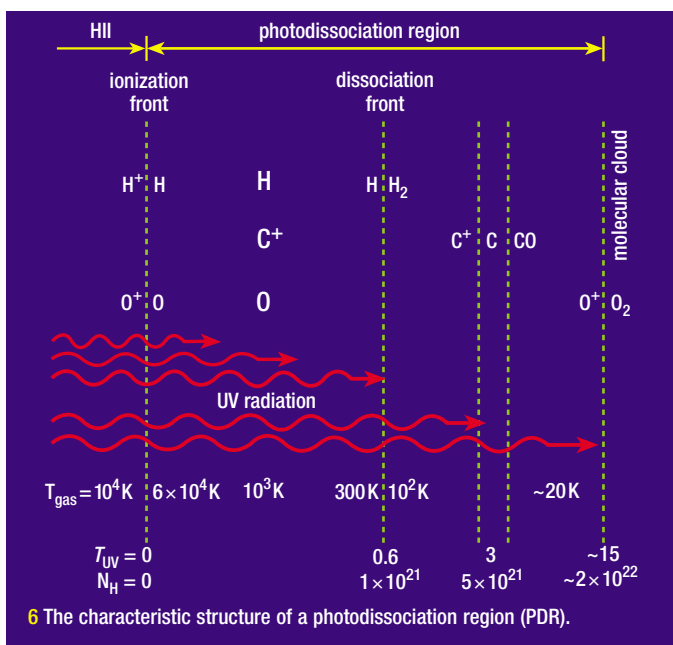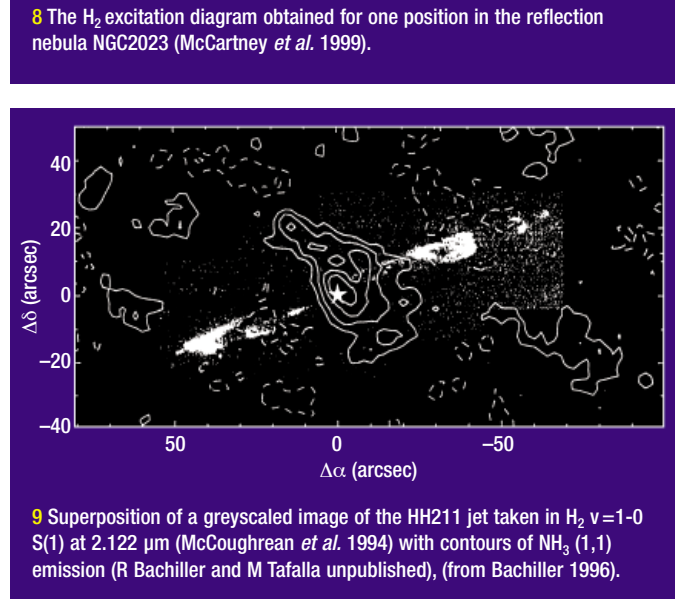

Downloaded from https://academic.oup.com/astrogeo/article/40/2/2-10/270879 by guest on 24 April 2024

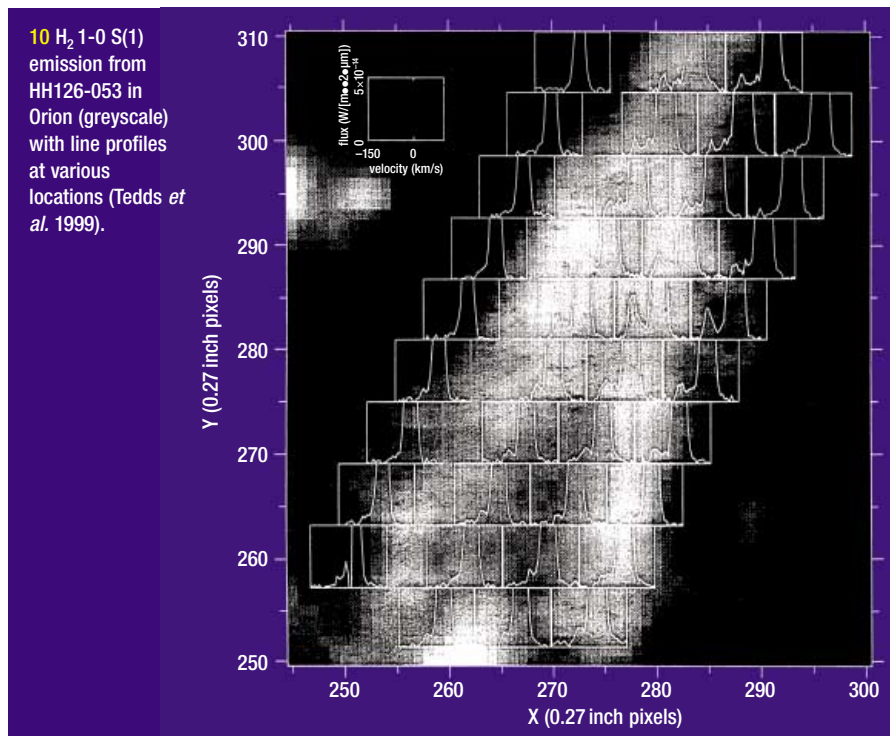

10 H<sub>2</sub> 1-0 S(1) emission from HH126-053 in Orion (greyscale) with line profiles at various locations (Tedds *et al.* 1999).

figure 7), and the excitation diagram has become a powerful tool. The single molecule, H<sub>2</sub>, may be excited in dozens of rotational and vibrational-rotational lines, providing a wealth of information about collisional and radiative processes.

A very detailed study has been made of H<sub>2</sub> emission in a bright filament of the reflection nebula NGC2023, caused by the proximity of a B1.5 star HD37903 to the edge of the molecular cloud L1630 (McCartney *et al.* 1999). The excitation diagram obtained (figure 8) shows the characteristics of a PDR, with sets of rotational energy levels for each vibrational state being separated. Attempts to fit these (and other) data have been made with some success by Draine and Bertoldi (1996), and in general the geometry of the cloud and its orientation with respect to the star may be inferred from the modelling. The radiation field at the filament must be about  $5 \times 10^3$  times stronger than the mean interstellar radiation field, and the density in the filament must be about  $10^5$  H<sub>2</sub> cm<sup>-3</sup>.

### H<sub>2</sub> in stellar jets and outflows

All young stellar objects (YSOs) undergo periods of intense mass loss. The youngest (so-called Class 0 objects) have the greatest rates of mass loss. The outflows are detectable at many wavelengths, from UV to radio (cf. Bachiller 1996) and are observed for YSOs of a wide range of masses and luminosities. The basic picture is of fast, well-collimated, oppositely directed winds, sweeping up ambient gas and creating two cavities, one on each side of the star. Molecular gas (often traced in CO) displaced from these cavities expands into irregular lobes. While this description is broadly sat-

isfactory, there is much that we do not know. What initiates the outflows? Why are the youngest outflows collimated into “jets”? How is the ambient molecular gas entrained? How do narrow jets create a wide cavity? Observations of H<sub>2</sub> have been important in addressing some of these questions.

H<sub>2</sub> emission is expected to occur whenever high-speed stellar jets impact on ambient molecular material, at least for orthogonal shock speeds up to about 50 km s<sup>-1</sup>. Many studies (cf. Hodapp and Ladd 1995) have shown H<sub>2</sub> emission to arise in the jets that give rise to Herbig-Haro objects, small knots of optical nebulosity. The H<sub>2</sub> emission often has a bow shock morphology, which supports the general picture that a Herbig-Haro object is the post-shock gas heated in a jet-cloud interaction.

H<sub>2</sub> infrared emission can be detected around many YSOs that are still deeply embedded in the dense gas from which they formed, and are optically invisible. For example, in L1448, a Class 0 source with a highly collimated outflow, the H<sub>2</sub> image reveals a well defined bow shock (Bally *et al.* 1993), while the slow moving CO emission (Bachiller *et al.* 1995) reveals a complementary structure centred on the star and delineating the cavity created by the bow shock. In figure 9, the region of the Class 0 source IC 348 – mm in a dense clump traced in NH<sub>3</sub>, the H<sub>2</sub> 1-0 S(1) emission traces gas that appears to be a “sheath” of mixing layer gas around the true jet (McCaughrean *et al.* 1994). Therefore, H<sub>2</sub> emission is giving information about the transfer of energy and momentum from the jet into the wider outflow. The situation is physically very complex, and requires a numerical hydrodynamical study of the mixing between the jet and the ambient molecular gas,

and the chemistry induced. Taylor and Raga (1995) have made a pioneering calculation of this type, and have predicted in particular the H<sub>2</sub> emission from a mixing layer. Noriega-Crespo *et al.* (1996) find that the optical and H<sub>2</sub> morphologies of the HH110 jet agree with the Taylor and Raga predictions. Recent studies (Lim *et al.* 1999) indicate that the physical mixing of the two gases is less pronounced than had previously been thought.

### Two H<sub>2</sub> excitation problems

Studies have been made of Orion Peak 1, an intense source of H<sub>2</sub> emission excited by the high-velocity outflow from the infrared source IRC2, using the Short Wavelength Spectrometer on board ISO (Rosenthal *et al.* 1999). A very rich H<sub>2</sub> spectrum of pure rotational lines was obtained from S(1) to S(25). The excitation diagram shows no hint of fluorescence, and the gas may be the hot post-shock material cooling through a range of temperatures.

The observation of the J=27 pure rotational level is remarkable enough, but the data also indicate that this level is overpopulated by a factor of five, and the authors suggest that a specific mechanism may be populating this level. It does not seem likely that grain surface reactions could contribute specifically to such a level (see “The formation of molecular hydrogen on interstellar dust” below). Rosenthal *et al.* suggest that the H<sup>-</sup> route to H<sub>2</sub> may leave the product in a high rotational state.

Orion contains a range of mysteries. When the Orion nebula is imaged in H<sub>2</sub> 1-0 S(1) and Fe emission (Allen and Burton 1993) a remarkable structure of “fingers” of emission is apparent. Tedds *et al.* (1999) have examined the tip of the most northerly finger, and measured the profile of the 1-0 S(1) line (figure 10). The line is typically around 150 km s<sup>-1</sup> wide. If such a velocity distribution is brought about by a shock, then it is at present unclear how H<sub>2</sub> molecules can survive a shock of that strength. In J-type shocks, H<sub>2</sub> is expected to be destroyed for shock velocities around 20 km s<sup>-1</sup>; in C-type shocks this limit is increased to around 45 km s<sup>-1</sup>. However, this is far from explaining velocities of ~150 km s<sup>-1</sup>.

### Molecular hydrogen and star formation

Interstellar clouds are mainly H<sub>2</sub>, and form the reservoir of mass from which new stars are made. The gravitational collapse of an interstellar cloud to form a star, from a typical density of ~10<sup>3</sup> H<sub>2</sub> cm<sup>-3</sup> and dimension about a parsec, must increase the density by some 21 orders of magnitude, compressing much of the mass into the size scale of stellar dimensions, ~10<sup>11</sup> cm. The release of gravitational potential energy during this process is enormous, and this energy must be radiated away.

Initially, the cloud has a temperature  $\sim 30$  K, not dissimilar to the temperature of Class 0 YSOs (Bachiller 1996) at the end of the collapse. Evidently, the cooling processes are efficient enough to maintain a low temperature throughout the collapse from the interstellar cloud phase (duration  $\approx 10^6$  years) Class 0 phase. Of course, the temperature rises rapidly as the YSO moves into the Class I phase.

Gravity must overcome thermal pressure, turbulence and magnetic pressure. The precise understanding of how this is achieved is one of the major challenges of astronomy today.

Although  $H_2$  cannot be the important coolant in such regions, as it is ineffective below  $\sim 100$  K, nevertheless  $H_2$  plays an important active role in fuelling a chemistry that provides molecular coolants (in addition to dust) that are capable of cooling to the lowest temperatures. Equally importantly, this chemistry also controls the fractional ionization, and thereby the magnetic support given to the cloud. In this section, I shall indicate briefly these roles of  $H_2$  in collapsing clouds (Hartquist *et al.* 1998).

Molecular hydrogen does not react readily with oxygen and carbon atoms; however, it can be transformed into a reactive species,  $H_3^+$ , by cosmic rays (c.r.):

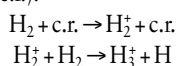

The  $H_3^+$  initiates by proton donation a sequence of H-abstractions from  $H_2$ , for example

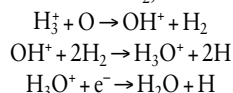

(with similar reactions for other species). The importance of  $H_2$  in this scheme is apparent; not only does it provide the initiating ion,  $H_3^+$ , it also fuels the sequence until the ion (in this case  $H_3O^+$ ) can take up no more hydrogen. Then, a recombination with electrons occurs. The result of this sequence is the formation of  $H_2O$ , and also  $OH$ ; these are two important coolants. A third,  $CO$ , can be created from them by other means, e.g.

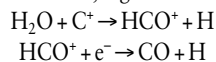

There is another entry to the carbon chemistry, through the slow radiative association of  $C^+$  with  $H_2$

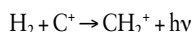

following which further H-abstractions from  $H_2$  occur, and ultimately dissociative recombination

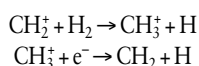

similar to the  $H_2O$  sequence.

The recombination of molecular ions such as  $H_3O^+$  and  $HCO^+$  is generally fast, and occurs dissociatively on almost every collision between the molecular ion and electron. Recombination of atomic ions, however, is a radiative process, and much slower. Therefore,

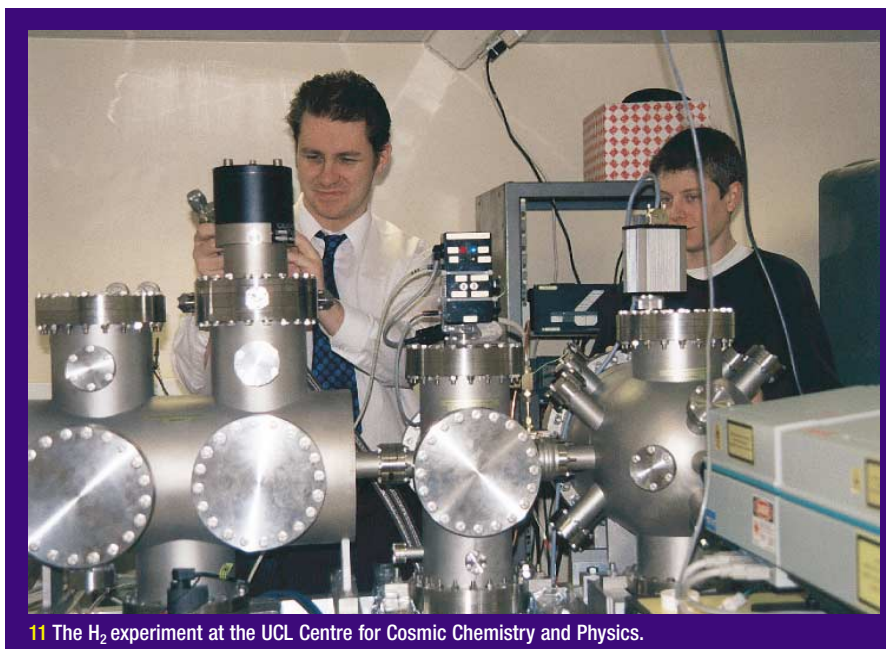

11 The  $H_2$  experiment at the UCL Centre for Cosmic Chemistry and Physics.

the effect of reactions of atomic ions with  $H_2$  or other molecules is to create molecular ions that are destroyed quickly. Hence, the fractional ionization in a molecular cloud is closely linked to the chemistry. Ruffle *et al.* (1998) have shown that the fractional ionization falls rather abruptly within a molecular cloud, for visual extinctions greater than about two magnitudes. This effect has been interpreted as a critical extinction; for clouds that are more heavily extinguished, then the ionization fraction falls (to about  $10^{-8}$ ) and the coupling of magnetic fields to the gas is much reduced, (the ambipolar diffusion timescale falls to  $\approx 10^6$  years), hence collapse may be initiated. The detailed observational study by Williams, Blitz and Stark (1995) of clumps in the Rosette Molecular Cloud, showed that stars were generally present in clumps with the highest CO column densities. See table 3 for a discussion of the timescales of collapse, chemistry, cooling and ambipolar diffusion.

The  $H_2$ -fuelled chemistry that occurs in molecular clouds is, therefore, capable of producing efficient coolants that enable the gravitational potential energy released in the collapse to be radiated away; simultaneously, the chemistry suppresses the fractional ionization that enables magnetic effects (including both static support and magnetic waves) to support the cloud.

### The formation of molecular hydrogen on interstellar dust

As we have seen, molecular hydrogen was formed in the early universe through a sequence of gas phase reactions involving atoms, protons, and electrons. The simple radiative association of two neutral H-atoms did not play a part, as this is strongly forbidden. Three body reactions were also excluded, at least until very high densities [ $n(H) \approx 10^{12} \text{ cm}^{-3}$ ] were achieved in collapsing regions. The fraction of hydrogen

converted to molecules in the early universe was generally rather small.

In the interstellar medium of the Galaxy, and other galaxies, much of the hydrogen is molecular. Evidently, a more efficient formation process is required. Along lines of sight where the  $H_2$  abundance is low enough for the absorption to be optically thin, the destruction rate of  $H_2$  by stellar UV radiation can be estimated accurately, and on the assumption of chemical steady state gives a reliable measure of the  $H_2$  formation rate. The gas phase routes are clearly inadequate, and it has been conventional for many years to invoke surface reactions on dust as the formation mechanism. This may seem to be a circular argument! Interstellar dust tends to form in regions that are chemically active, yet – as we have seen above –  $H_2$  is needed for an active chemistry. Which is the chicken, and which the egg? The way out of this dilemma is to recognize that much of the dust is produced in very dense circumstellar environments where three-body (and other) reactions to form  $H_2$  will operate. In the interstellar clouds, however, where most of the hydrogen is  $H_2$ , the densities are much lower, and only surface reactions on dust (that has emerged from circumstellar regions) seem capable of generating the observed  $H_2$ .

From the dust number density and size distribution inferred from studies of interstellar extinction, one can deduce that the surface formation of  $H_2$  on interstellar dust grains is required to be reasonably efficient; i.e. most H atoms arriving at a grain surface must leave as a part of a molecule. The energy budget has also been an important topic of discussion: how much of the energy released in the formation of  $H_2$  appears as internal excitation, as kinetic energy, or is deposited in the grain itself? The answers to these questions affect the interpretation of  $H_2$  observations and potential

**Table 3: Timescales in star-forming regions**

| Process             | Mechanism             | Approx. timescale (y)         | Timescale for $n_H = 10^4 \text{ cm}^{-3}$ |
|---------------------|-----------------------|-------------------------------|--------------------------------------------|
| Collapse            | Gravitation           | $10^8/n_H^{1/2}$              | $10^6$                                     |
| Chemistry           | Ion–molecule reaction | $3 \times 10^5$               | $3 \times 10^5$                            |
| Cooling             | Molecular radiation   | $3 \times 10^9/n_H$           | $3 \times 10^5$                            |
| Ambipolar diffusion | Ion–neutral drift     | $4 \times 10^5[X(i)/10^{-8}]$ | $4 \times 10^5$                            |

$X(i)$  is the fractional ionization,  $X(i) = n(\text{ions})/n_H$  and is about  $10^{-8}$  in dark interstellar clouds

heating mechanisms of gas and dust.

Early studies of the surface formation process have been largely superseded by huge advances in both experimental and theoretical capabilities. It is now possible to contemplate undertaking fairly realistic studies both in the laboratory and through numerical modelling. The  $H_2$  formation problem has become the focus of a major experimental and theoretical effort at UCL, under the auspices of the UCL Centre for Cosmic Chemistry and Physics. The programme has been generously funded in a rare joint grant from EPSRC and PPARC.

### The UCL experiment on $H_2$ formation

The experiment will be an advance on any recent work in that the reaction efficiency and the total energy budget will be determined simultaneously. A variety of reaction surfaces will be used, ranging from ideal crystalline to more realistic amorphous materials. The initial experiments will concentrate on carbons, though silicates will also be used. The apparatus is illustrated in figure 11. An H-atom source (on the left) provides a beam ( $\sim 10^{16} \text{ H cm}^{-2} \text{ s}^{-1}$ ) that is cooled to 10–100 K, and mechanically chopped to give a pulsed H-atom beam (period  $\sim 10^{-5}$  s). This beam enters the chamber (on the right) and impinges on the substrate maintained at 10 K, and product molecules leaving the surface are ionized by a laser (visible in the foreground) and the ions formed are detected by a time-of-flight mass spectrometer. The background gas will have a pressure  $< 10^{-10}$  torr. These procedures will result in the determination of the recombination efficiency, the internal ( $v, J$ ) excitation of the product  $H_2$  and its translational energy.

Our results for the recombination efficiency will be compared with on-going theoretical work, and with experiments conducted by other teams. Pirronello *et al.* (1997a, b) have reported the results of experiments in which HD was formed from H and D atom beams at temperatures in the range 5–15 K on the surfaces of an olivine slab, at a pressure of  $10^{-10}$  torr. The main results of those authors for those experiments were that the formation rate was low compared to earlier predictions (Hollenbach *et al.* 1971) that were in harmony with the observations. Clearly, more experimental study of this problem is required, and

results from the UCL experiment should be available later this year.

Theoretical studies of  $H_2$  formation are also underway in the UCL Centre. Preliminary results have been reported by Farebrother, Fisher and Clary (1999) for the formation of  $H_2$  by the (vertical) approach of an H-atom directly on to another H-atom chemically bonded to a (horizontal) piece of graphite lattice (see Williams 1998). The system is extended by periodic boundary conditions. The entire system is treated quantum mechanically using the density functional method. The preliminary results for this direct approach (the Eley–Rideal mechanism) are that there is a barrier-free approach, that the reaction probability is very close to unity, and that the product  $H_2$  has considerable internal excitation, with states  $v=3$  and 4 being highly populated. With the geometry used in this calculation, no rotational excitation can occur. The calculation is now being generalized to include H-atoms incident on the bound H-atoms at any angle. The diffusion approach (the Langmuir–Hinshelwood mechanism) will also be investigated.

### Molecular Dynamics

These preliminary  $H_2$  formation results can also be compared with a major study using the classical Molecular Dynamics approach (Takahashi *et al.* 1999a,b). The surface used in these experiments was amorphous  $H_2O$  ice, itself numerically prepared by Molecular Dynamics calculations. Then numerical experiments are performed in which an H atom collides with the ice surface and binds at an appropriate site. Subsequently, a second H atom interacts with the surface, and with the H atom. Many trajectories are explored. Both Eley–Rideal and Langmuir–Hinshelwood types of reaction are observed to occur, with high reaction probability, in these numerical experiments. The  $H_2$  molecules are found to be in highly excited vibrational states,  $v=5-8$ , and less than 5% of the  $H_2$  bond energy appears in the surface.

### Conclusions

Molecular hydrogen is not merely a passive reservoir of mass awaiting transformation into stars. It had an active role in promoting structure in the early universe, and by fuelling a chemistry in interstellar clouds it is active in

controlling the processes in star formation. Molecular hydrogen is an ideal tracer of warm gas in interstellar and circumstellar regions, with a rich infrared spectrum. ●

*Prof. David A Williams, President of the Royal Astronomical Society. Department of Physics and Astronomy, University College London, Gower Street, London WC1E 6BT.*

### References

- Allen D A and Burton M G 1993 *Nature* **363** 54.  
 Bachiller R 1996 *ARAA* **34** 111.  
 Bachiller R *et al.* 1995 *A&A* **299** 857.  
 Bally J *et al.* 1993 *ApJ* **418** 322.  
 Brown A *et al.* 1981 *Nature* **290** 34.  
 Burton M G 1992 *Aust J Phys* **45** 463.  
 Cahn J H *et al.* 1992 *A&AS* **94** 399.  
 Carruthers G C 1970 *ApJ* **161** L81.  
 Couchman H M P and Rees M J 1986 *MNRAS* **221** 53.  
 Cox P *et al.* 1998 *ApJ* **495** L23.  
 Dalgarno A and Lepp S 1996 in *Handbook of Atomic and Molecular Physics* ed. G Drake, AIP Press, New York.  
 Draine B and Bertoldi F 1996 *ApJ* **468** 269.  
 Farebrother A *et al.* 1999 in preparation.  
 Gautier T N *et al.* 1976 *ApJ* **207** L129.  
 Haiman Z *et al.* 1996b *ApJ* **464** 523.  
 Haiman Z *et al.* 1996a *ApJ* **467** 522.  
 Hartquist T W *et al.* 1998 in *The Molecular Astrophysics of Stars and Galaxies*, eds T W Hartquist and D A Williams, Oxford Science Publications, Oxford, 101.  
 Hollenbach D, Werner M and Salpeter E E 1971 *ApJ* **163** 165.  
 Hollenbach D and Tielens A G G M 1997 *ARAA* **35** 179.  
 Howe D A *et al.* 1984 *MNRAS* **271** 811.  
 Howe D A and Williams D A 1998 in *The Molecular Astrophysics of Stars and Galaxies*, eds T W Hartquist and D A Williams, Oxford Science Publications, Oxford 347.  
 Kahn F D 1983 in *Planetary Nebulae*, IAU Symposium **103**, Reidel, Dordrecht, ed. D Flower, 305.  
 Jordan C *et al.* 1977 *Nature* **270** 326.  
 Kang H and Shapiro P R 1992 *ApJ* **386** 432.  
 Kwok S 1983 in *Planetary Nebulae*, IAU Symposium **103**, Reidel Dordrecht, ed. D Flower, 293.  
 Lepp S and Shull J M 1984 *ApJ* **280** 465.  
 Lepp S and Stancil P C 1988 in *The Molecular Astrophysics of Stars and Galaxies*, eds T W Hartquist and D A Williams, Oxford Science Publications, Oxford, **37**.  
 Lim A J *et al.* 1999 *MNRAS*, submitted.  
 McCartney M *et al.* 1999 *MNRAS* in press.  
 McCaughrean M J *et al.* 1994 *ApJ* **436** L189.  
 Noriega-Crespo A *et al.* 1996 *ApJ* **462** 804.  
 Ostriker J P and Gnedin N Y 1996 *ApJ* **472** L63.  
 Peebles P J E and Dicke R H 1968 *ApJ* **154** 891.  
 Pirronello V *et al.* 1997b *ApJ* **483** L131.  
 Pirronello V *et al.* 1997a *ApJ* **475** L69.  
 Rosenthal D *et al.* 1998 Proc. ISO Meeting, Paris, **5**.  
 Ruffle D P *et al.* *AA* **334** 678.  
 Sandford S A *et al.* 1993 *Science* **262** 400.  
 Spitzer L Jr *et al.* 1974 *ApJ Suppl* **28** 373.  
 Stecher T P and Williams D A 1967 *ApJ* **149** L29.  
 Sternberg A 1998 in *The Molecular Astrophysics of Stars and Galaxies*, eds T W Hartquist and D A Williams, Oxford Science Publications, Oxford, 201.  
 Takahashi J *et al.* 1999a *ApJ* in press.  
 Takahashi J *et al.* 1999b *MNRAS* in press.  
 Taylor S D and Raga A C 1995 *AA* **296** 823.  
 Tedds J *et al.* 1999 *MNRAS* in press.  
 Tegmark M *et al.* 1997 *ApJ* **474** 1.  
 Treffers R R *et al.* 1976 *ApJ* **209** 793.  
 Walsh J R and Meaburn J 1987 *MNRAS* **224** 885.  
 Williams D A 1998 *Faraday Discussions* **109** 1.  
 Williams J P *et al.* 1995 *ApJ* **451** 252.  
 Witt A N *et al.* 1989 *ApJ* **336** L21.  
 Young K *et al.* 1997 *ApJ* **482** L101.
